# Supplementary material for: Modelling HDV kinetics under the entry inhibitor bulevirtide suggests the existence of two HDV-infected cell populations
Source: PubMed Central journal article supplement — JHEP Rep. 2023 Nov 15;6(2):100966. doi: 10.1016/j.jhepr.2023.100966 (PMC10808955; doi:10.1016/j.jhepr.2023.100966), 2023-11-15
Supplement: mmc1.pdf [file mmc1.pdf]

# Modelling HDV kinetics under entry-inhibitor Bulevirtide suggests the existence of two HDV-infected cell populations

Louis Shekhtman, Scott J Cotler, Elisabetta Degasperi, Maria Paola Anolli, Sara Colonia Uceda Renteria, Dana Sambarino, Marta Borghi, Riccardo Perbellini, Floriana Facchetti, Ferruccio Ceriotti, Pietro Lampertico, Harel Dahari

## Table of contents

|          |       |   |
|----------|-------|---|
| Table S1 | ..... | 2 |
| Table S2 | ..... | 3 |
| Fig. S1  | ..... | 4 |
| Fig. S2  | ..... | 5 |
| Fig. S3  | ..... | 6 |
| Fig. S4  | ..... | 7 |

| BASELINE (Pre-treatment) |     |     |      |           |                           |               |                 |                     |                 |           |                     |           |               |                       |           |            |            |           |             |             |                  |
|--------------------------|-----|-----|------|-----------|---------------------------|---------------|-----------------|---------------------|-----------------|-----------|---------------------|-----------|---------------|-----------------------|-----------|------------|------------|-----------|-------------|-------------|------------------|
| Pts                      | Age | Sex | BMI  | ALT (U/l) | PLT (x10 <sup>9</sup> /l) | HBsAg (IU/ml) | HBV DNA (IU/ml) | HDV RNA (log IU/ml) | Fibroscan (Kpa) | AST (U/l) | Bile acids (umol/l) | ALP (U/l) | T bil (mg/dl) | IgG (mg/dl, ULN 1600) | GGT (U/l) | PCHE (U/l) | Alb (g/dl) | IG (g/dl) | AFP (ng/ml) | sCr (mg/dl) | HBcrAg (logU/ml) |
| #1                       | 47  | M   | 27.5 | 151       | 48                        | 4891          | TND             | 5.15                | 39              | 94        | 18                  | 76        | 0.9           | 4059                  | 47        | 4389       | 3.9        | 3.4       | 9           | 0.93        | 3.50             |
| #2                       | 40  | M   | 27.8 | 172       | 217                       | 6506          | TND             | 5.58                | 8.9             | 89        | 17                  | 90        | 0.6           | 2686                  | 26        | 8378       | 4.2        | 2.3       | 4           | 0.92        | 3.90             |
| #3                       | 35  | M   | 27.4 | 107       | 47                        | 5299          | TND             | 5.70                | 23.1            | 103       | 33                  | 132       | 1.5           | 2121                  | 37        | 5971       | 3.9        | 1.8       | 15          | 1.02        | 4.60             |
| #4                       | 39  | M   | 23.4 | 79        | 59                        | 5076          | 11              | 3.26                | 32.8            | 94        | 51                  | 201       | 1.1           | 2506                  | 196       | 3619       | 3.8        | 2.2       | 6           | 0.91        | 3.30             |
| #5                       | 62  | M   | 24.6 | 99        | 68                        | 6400          | <10             | 4.64                | 7.8             | 66        | 15                  | 100       | 1.4           | 1876                  | 52        | 6172       | 3.9        | 1.6       | 7           | 0.98        | 5.10             |
| #6                       | 34  | F   | 23.5 | 84        | 43                        | 8393          | 15              | 4.39                | 16.3            | 64        | 28                  | 105       | 1.4           | 2458                  | 52        | 3506       | 3.5        | 2.2       | 9           | 0.65        | 3.70             |
| #7                       | 29  | M   | 28.0 | 133       | 71                        | 2450          | 15              | 6.32                | 10.9            | 136       | 18                  | 173       | 1             | 2250                  | 197       | 7234       | 4.2        | 1.9       | 5           | 0.96        | 3.90             |
| #8                       | 57  | F   | 23.0 | 49        | 76                        | 12344         | <10             | 5.60                | 9.4             | 52        | 8                   | 79        | 0.9           | 1047                  | 29        | 2983       | 4.1        | 1         | 9           | 0.85        | 4.60             |
| #9                       | 62  | M   | 27.0 | 80        | 60                        | 8561          | TND             | 6.22                | 39.8            | 86        | 82                  | 174       | 1.4           | 1712                  | 79        | 3964       | 3.6        | 1.6       | 44          | 0.82        | 4.20             |
| #10                      | 40  | F   | 22.5 | 51        | 63                        | 2407          | TND             | 3.31                | 14.6            | 57        | 14                  | 86        | 0.5           | 1600                  | 20        | 5994       | 4.2        | 1.4       | 5           | 0.66        | 3.70             |
| #11                      | 40  | F   | 20.9 | 113       | 37                        | 9147          | <10             | 4.34                | 24              | 214       | 48                  | 176       | 1.5           | 3587                  | 97        | 2037       | 2.9        | 3         | 8           | 0.82        | 3.80             |
| #12                      | 70  | F   | 30.1 | 155       | 59                        | 370           | 22              | 4.58                | 16.5            | 153       | 26                  | 137       | 1             | 2465                  | 13        | 4216       | 3.6        | 2.3       | 7           | 0.82        | 3.80             |
| #13                      | 49  | M   | 22.2 | 86        | 73                        | 1112          | TND             | 3.95                | 11.6            | 89        | 18                  | 100       | 1.7           | 1851                  | 75        | 5875       | 3.5        | 1.7       | 596         | 0.83        | 3.10             |
| #14                      | 54  | M   | 22.3 | 222       | 122                       | 19266         | <10             | 6.60                | 33.3            | 208       | 48                  | 308       | 1             | 2670                  | 362       | 6150       | 4.1        | 2.3       | 17          | 0.84        | <2.0             |
| #15                      | 68  | M   | 26.7 | 105       | 91                        | 6701          | 14              | 6.27                | 15.5            | 113       | 32                  | 79        | 1.5           | 1968                  | 52        | 4554       | 3.7        | 1.9       | 26          | 0.94        | 4.90             |
| #16                      | 59  | M   | 26.9 | 112       | 96                        | 2708          | TND             | 5.87                | 57.8            | 97        | 20                  | 186       | 1.4           | 3713                  | 83        | 3797       | 3.6        | 3.1       | 11          | 0.65        | 5.00             |
| #17                      | 47  | F   | 20.5 | 32        | 78                        | 5231          | <10             | 3.74                | 17.4            | 55        | 306                 | 104       | 1.8           | 1554                  | 26        | 1807       | 4.4        | 1.4       | 4           | 0.84        | 4.50             |
| #18                      | 77  | M   | 23.0 | 145       | 185                       | 349           | TND             | 4.39                | 15.2            | 88        | 11                  | 91        | 0.5           | 2285                  | 15        | 5190       | 4          | 2.1       | 3           | 0.96        | 3.50             |

**Table S1.** Baseline features of the 18 HDV patients treated with BLV 2 mg/day. BMI, body mass index, M, male; F, female; ALT: alanine aminotransferase; PLT: platelet count; HBsAg: Hepatitis B surface antigen; T bil: Total Bilirubin; Alb: albumin; sCr: creatinine; TND: target not detected; the Lower Limit of Quantification of the HDV RNA assay was 6 IU/ml (0.78 log IU/ml)

| Pts | WEEK 24   |               |                 |                     | WEEK 48   |               |                 |                     |
|-----|-----------|---------------|-----------------|---------------------|-----------|---------------|-----------------|---------------------|
|     | ALT (U/l) | HBsAg (IU/ml) | HBV DNA (IU/ml) | HDV RNA (log IU/ml) | ALT (U/l) | HBsAg (IU/ml) | HBV DNA (IU/ml) | HDV RNA (log IU/ml) |
| #1  | 18        | 4997          | <10             | 2.55                | 15        | 4252          | TND             | 2.02                |
| #2  | 29        | 6342          | TND             | 2.59                | 24        | 5610          | TND             | 2.11                |
| #3  | 22        | 5429          | TND             | 3.58                | 27        | 4838          | <10             | 3.38                |
| #4  | 52        | 4183          | <10             | 1.96                | 57        | 4001          | <10             | TND                 |
| #5  | 41        | 7274          | <10             | <0.78               | 35        | 6481          | TND             | <0.78               |
| #6  | 32        | 11774         | TND             | 1.56                | 53        | 8630          | TND             | 2.90                |
| #7  | 76        | 2791          | <10             | 5.77                | 86        | 2674          | 21              | 5.99                |
| #8  | 46        | 13729         | <10             | 2.56                | 38        | 14793         | <10             | 1.30                |
| #9  | 51        | 11501         | <10             | 5.28                | 53        | 10607         | TND             | 6.02                |
| #10 | 26        | 3107          | <10             | 1.26                | 28        | 2778          | <10             | <0.78               |
| #11 | 78        | 12091         | <10             | <0.78               | 51        | 8474          | TND             | <0.78               |
| #12 | 20        | 417           | TND             | 1.26                | 17        | 355           | TND             | 0.95                |
| #13 | 22        | 1209          | TND             | 1.68                | 23        | 820           | TND             | 2.34                |
| #14 | 82        | 19821         | <10             | 3.90                | 55        | 18239         | <10             | 2.98                |
| #15 | 28        | 7327          | <10             | 4.02                | 33        | 5344          | <10             | 4.45                |
| #16 | 36        | 2595          | <10             | 2.92                | 34        | 1974          | TND             | 2.46                |
| #17 | 45        | 7424          | <10             | 1.62                | 36        | 7414          | <10             | 2.37                |
| #18 | 19        | 311           | <10             | 1.20                | 22        | 284           | TND             | <0.78               |

**Table S2. Measurements during therapy of the 18 HDV patients treated with BLV 2 mg/day.** ALT: alanine aminotransferase; HBsAg: Hepatitis B surface antigen; TND: target not detected; the Lower Limit of Quantification of the HDV RNA assay was 6 IU/ml (0.78 log IU/ml)

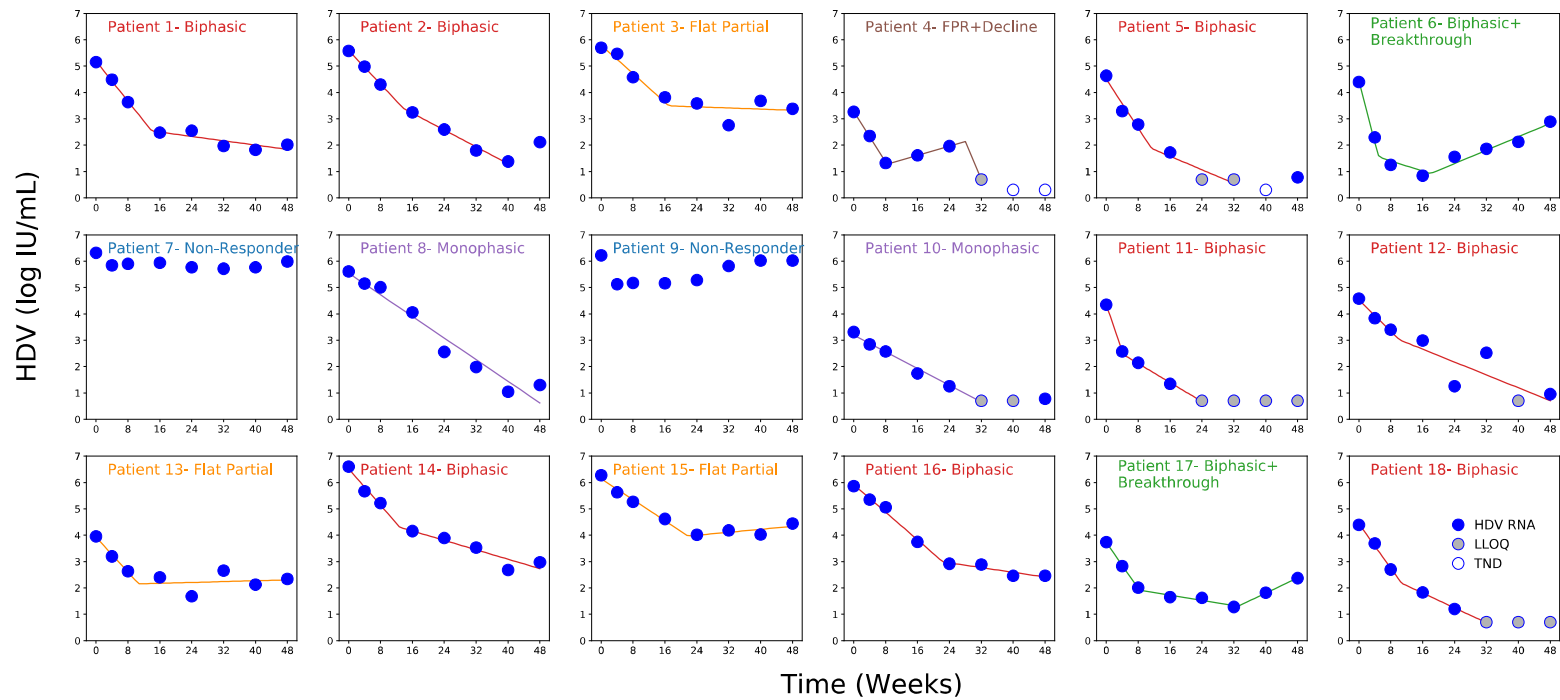

Fig. S1. Patient kinetic fits using piecewise linear fits.

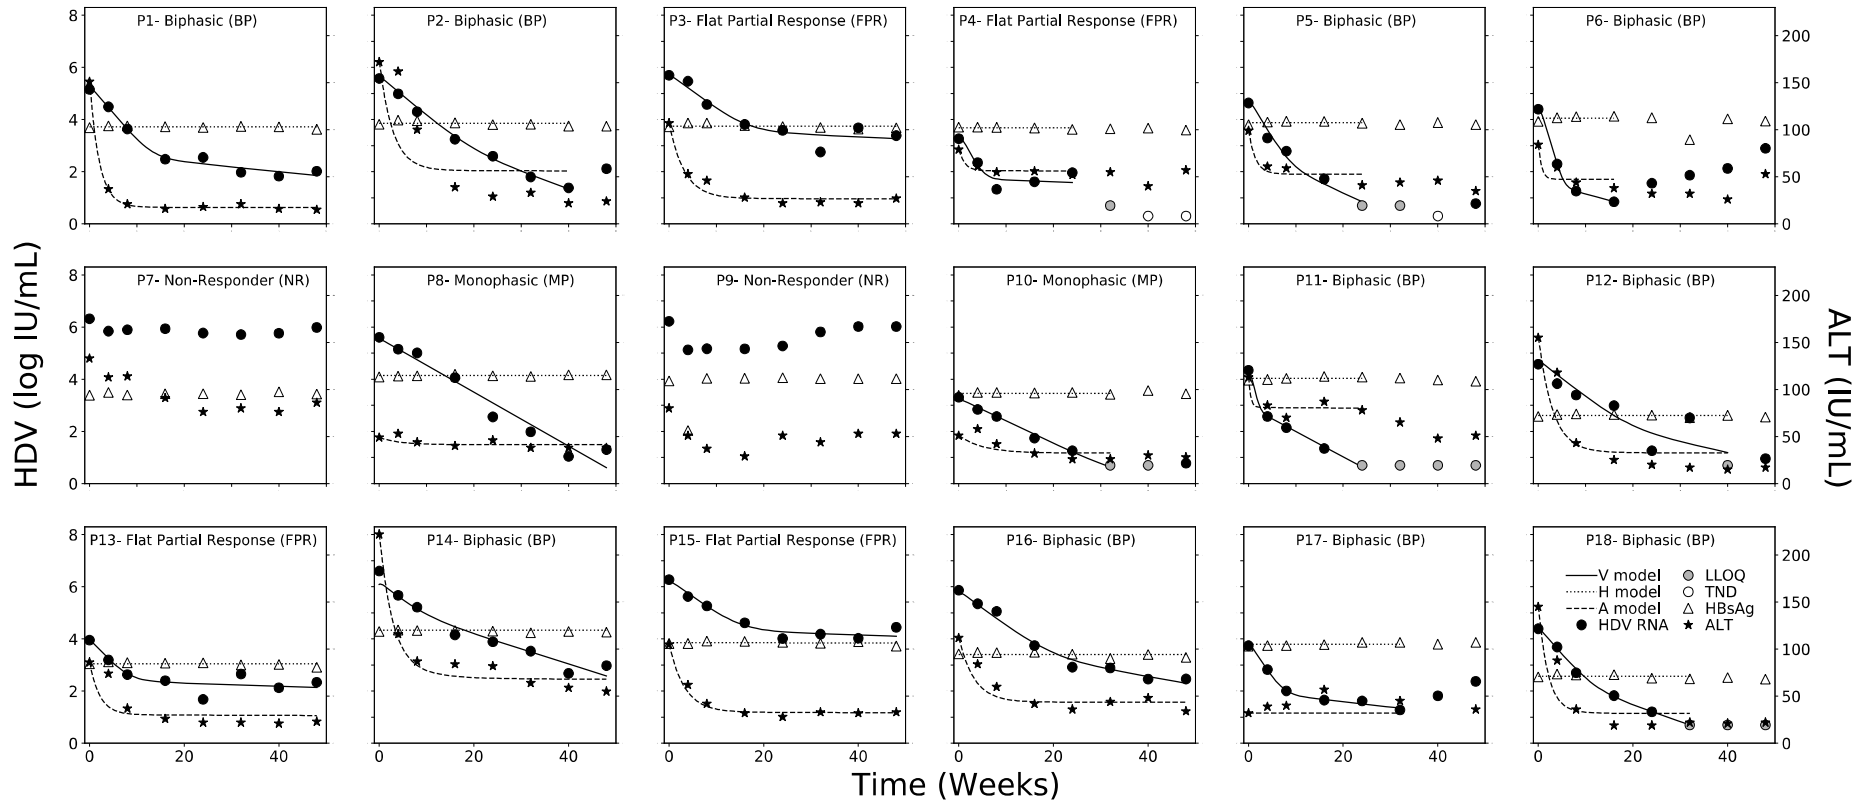

Fig. S2. Fit curves of all patients (including 2 NR patients – without modeling curves)

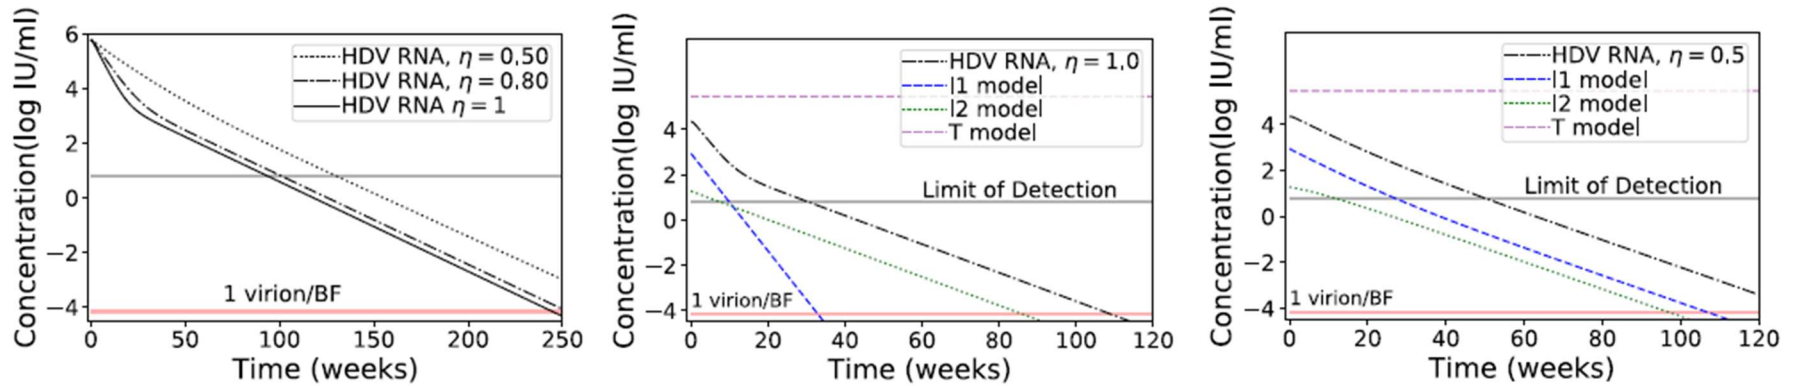

**Fig. S3. Robustness of results to variations in BLV effectiveness in blocking infection.** (a) Here we show how reducing the BLV effectiveness in blocking production from  $\eta=1$  to  $\eta=0.8$  and  $\eta=0.5$  changes the HDV RNA dynamics. We show the difference based on estimated parameters for Patient 18 (Table 1, main manuscript) and find minimal changes to the HDV RNA dynamics until  $\eta=0.5$ , at which point the viral dynamics curve becomes monophasic and is considerably higher. (b)-(c) We show the dynamics of  $I_1$ ,  $I_2$  and  $T$  during treatment for (b)  $\eta=1$  and (c)  $\eta=0.5$  to explain how the lower  $\eta$  allows for cell infection to occur and thereby delays the crossover point at which  $I_2$  becomes dominant to well beyond the point where the virus becomes undetectable.

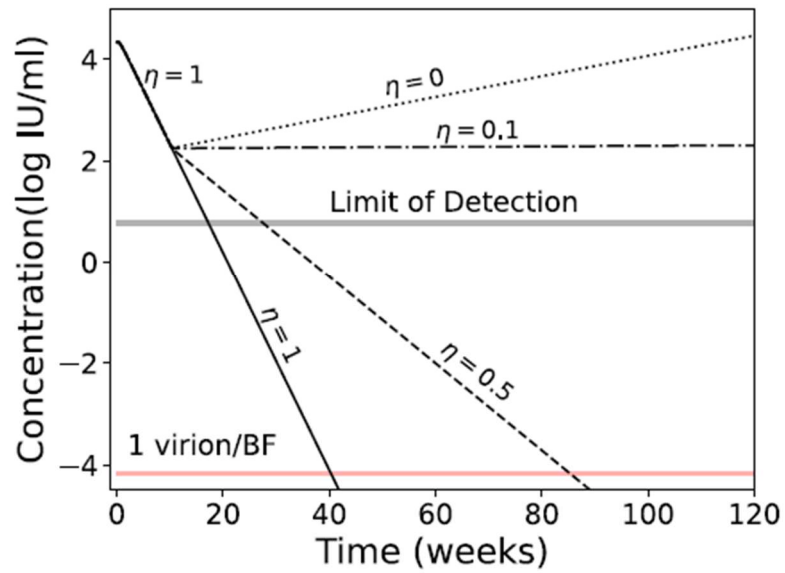

Fig. S4. HDV RNA Concentration as a function of time for different values of blocking of infection. We find that reducing blocking of infection from 100% effectiveness ( $\eta=1$ ) to lower levels can explain the biphasic pattern (if  $\eta=0.5$ ), the flat partial response (if  $\eta=0.1$ ) and a potential rebound (if  $\eta=0$ ). Other parameters correspond to the fit results for Patient 18 (Table 1, main manuscript).
